Correction

# Correction: Methionine-Restricted C57BL/6J Mice Are Resistant to Diet-Induced Obesity and Insulin Resistance but Have Low Bone Density

The PLOS ONE Staff

In the Abstract and in the Materials and Methods, the article states that control and MR groups were fed with 0.86% methionine or 0.12% methionine. These values are correct, but they represent KCal percentages.

The percentage values represented in Table 1 and Table S1 are gram percentages. The authors have provided corrected versions of Table 1 and Table S1 below.

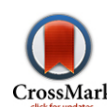

**Table 1.** Diet composition of HFD-fed CF and MR mice.

| Ingredients                      | % gm / % Kcal         |
|----------------------------------|-----------------------|
| L-Arginine                       | 1.48/1.13             |
| L-Histidine-HCl-H <sub>2</sub> O | 0.44/0.33             |
| L-Isoleucine                     | 1.09/0.83             |
| L-Leucine                        | 1.47/1.1              |
| L-Lysine                         | 1.91/1.45             |
| DL-Methionine                    | 0.16/0.12 (1.14/0.86) |
| L-Phenylalanine                  | 1.53/1.15             |
| L-Threonine                      | 1.09/0.83             |
| L-Tryptophan                     | 0.24/0.18             |
| L-Valine                         | 1.09/0.83             |
| L-Glutamic Acid                  | 4.55/3.45 (3.57/2.71) |
| Glycine                          | 3.08/2.33             |
| Corn Starch                      | 0/0                   |
| Maltodextrin                     | 7.52/5.68             |
| Dextrose                         | 6.62/5                |
| Sucrose                          | 19.85/15              |
| Cellulose                        | 6.62/0                |
| Lard                             | 28.98/49.28           |
| Corn Oil                         | 6.09/10.35            |
| Minerals                         | 4.63/0                |
| Vitamins                         | 1.32/1                |
| Choline Bitartrate               | 0.26/0                |
| Dye                              | 0.01/0                |

High fat diets were purchased from Research Diets, Inc., New Brunswick, NJ. Control-fed (CF) on HFD catalog number: A11051306 and methionine-restricted (MR) on HFD catalog number: A11051305. Numbers in parenthesis are levels of DL-methionine and L-glutamic acid in the CF diet.  
doi:10.1371/journal.pone.0051357.t001

**Citation:** The PLOS ONE Staff (2014) Correction: Methionine-Restricted C57BL/6J Mice Are Resistant to Diet-Induced Obesity and Insulin Resistance but Have Low Bone Density. PLoS ONE 9(7): e104050. doi:10.1371/journal.pone.0104050

**Published:** July 25, 2014

**Copyright:** © 2014 The PLOS ONE Staff. This is an open-access article distributed under the terms of the Creative Commons Attribution License, which permits unrestricted use, distribution, and reproduction in any medium, provided the original author and source are credited.

**Table S1.** Diet Composition of LFD-fed mice.

| Ingredients                      | % gm / % Kcal         |
|----------------------------------|-----------------------|
| L-Arginine                       | 1.09/1.13             |
| L-Histidine-HCl-H <sub>2</sub> O | 0.32/0.33             |
| L-Isoleucine                     | 0.8/0.83              |
| L-Leucine                        | 1.08/1.1              |
| L-Lysine                         | 1.4/1.45              |
| DL-Methionine                    | 0.12/0.12 (0.84/0/86) |
| L-Phenylalanine                  | 1.13/1.15             |
| L-Threonine                      | 0.8/0.83              |
| L-Tryptophan                     | 0.17/0.18             |
| L-Valine                         | 0.8/0.83              |
| L-Glutamic Acid                  | 3.34/3.45 (2.62/2.71) |
| Glycine                          | 2.26/2.33             |
| Corn Starch                      | 53.38/54.95           |
| Maltodextrin                     | 0/0                   |
| Dextrose                         | 4.86/5                |
| Sucrose                          | 14.57/15              |
| Cellulose                        | 4.86/0                |
| Lard                             | 0/0                   |
| Corn Oil                         | 4.47/10.35            |
| Minerals                         | 3.4/0                 |
| Vitamins                         | 0.97/1                |
| Choline Bitartrate               | 0.19/0                |
| Dye                              | 0/0                   |

Low fat diets were purchased from Research Diets, Inc., New Brunswick, NJ. Control-fed (CF) on LFD catalog number: A11051302 and methionine-restricted (MR) on LFD catalog number: A11051301. Numbers in parenthesis are levels of DL-methionine and L-glutamic acid in the CF diet.  
doi:10.1371/journal.pone.0051357.t002

## Reference

1. Ables GP, Perrone CE, Orentreich D, Orentreich N (2012) Methionine-Restricted C57BL/6j Mice Are Resistant to Diet-Induced Obesity and Insulin Resistance but Have Low Bone Density. PLoS ONE 7(12): e51357. doi:10.1371/journal.pone.0051357
